# Supplementary material
Source: PubMed Central journal article supplement (PMC2625427)
Supplement: 11665_1.pdf [file 11665_1.pdf]

# Primary prophylaxis of invasive fungal infections in patients with hematologic malignancies. Recommendations of the Infectious Diseases Working Party of the German Society for Haematology and Oncology

Oliver A. Cornely,<sup>1,2</sup> Angelika Böhme,<sup>3</sup> Dieter Buchheidt,<sup>4</sup> Hermann Einsele,<sup>5</sup> Werner J. Heinz,<sup>5</sup> Meinolf Karthaus,<sup>6</sup> Stefan W. Krause,<sup>7</sup> William Krüger,<sup>8</sup> Georg Maschmeyer,<sup>9</sup> Olaf Penack,<sup>10</sup> Jörg Ritter,<sup>11</sup> Markus Ruhnke,<sup>12</sup> Michael Sandherr,<sup>13</sup> Michal Sieniawski,<sup>14</sup> Jörg-Janne Vehreschild,<sup>1</sup> Hans-Heinrich Wolf,<sup>15</sup> and Andrew J. Ullmann<sup>16</sup>

<sup>1</sup>Klinik I für Innere Medizin, Klinikum der Universität Köln, and <sup>2</sup>Zentrum für Klinische Studien (01KN0706), Köln; <sup>3</sup>Onkologikum Frankfurt am Museumsufer, Frankfurt; <sup>4</sup>III. Medizinische Klinik, Universitätsklinikum Mannheim gGmbH, Mannheim; <sup>5</sup>Medizinische Klinik und Poliklinik II, Universitätsklinikum Würzburg, Würzburg; <sup>6</sup>Klinik für Hämatologie und Onkologie, Klinikum Neuperlach, München; <sup>7</sup>Medizinische Klinik 5, Hämatologie und Internistische Onkologie, Universitätsklinikum Erlangen, Erlangen; <sup>8</sup>Medizinische Klinik C, Ernst-Moritz-Arndt-Universität, Greifswald; <sup>9</sup>Medizinische Klinik Hämatologie und Onkologie, Klinikum Ernst von Bergmann, Potsdam; <sup>10</sup>Charité, Campus Benjamin Franklin, Klinik für Hämatologie und Onkologie, Berlin; <sup>11</sup>Pädiatrische Hämatologie/Onkologie, Universitätsklinikum Münster, Münster; <sup>12</sup>Charité Universitätsmedizin, Campus Charité Mitte, Medizinische Klinik und Poliklinik II, Berlin; <sup>13</sup>Schwerpunktpraxis für Hämatologie und Onkologie, Weilheim, Germany; <sup>14</sup>Haematological Sciences (CALs), Leech Building, Medical School, Newcastle upon Tyne, United Kingdom; <sup>15</sup>Martin-Luther-Universität Halle-Wittenberg, Halle, and <sup>16</sup>Johannes Gutenberg-Universität, III. Medizinische Klinik, Mainz, Germany

Citation: Cornely OA, Böhme A, Buchheidt D, Einsele H, Heinz WJ, Karthaus M, Krause SW, Krüger W, Maschmeyer G, Penack O, Ritter J, Ruhnke M, Sandherr M, Sieniawski M, Vehreschild J-J, Wolf H-H, and Ullmann AJ. Primary prophylaxis of invasive fungal infections in patients with hematologic malignancies. Recommendations of the Infectious Diseases Working Party of the German Society for Haematology and Oncology. *Haematologica* 2009. doi: 10.3324/haematol.11665

## Online Supplementary Tables S1 to S7

**Table S1.** Fluconazole prophylaxis.

| Author                                   | Year | Design     | Medication/daily dose per treatment arm | n=  | Risk factors %                                              | Invasive fungal infection |            |            | Mortality |          |
|------------------------------------------|------|------------|-----------------------------------------|-----|-------------------------------------------------------------|---------------------------|------------|------------|-----------|----------|
|                                          |      |            |                                         |     |                                                             | Proven %                  | Probable % | Possible % | Total %   | Fungal % |
| Chandrasekar <sup>20</sup>               | 1994 | rd, db, pl | FLU 400 mg<br>placebo                   | 23  | 91 AL                                                       | 8.6                       | 0          | 0          | 17.4      | 8.6      |
|                                          |      |            |                                         | 23  | 9 other hematomol                                           | 4.3                       | 0          | 0          | 13        | 4.3      |
| Goodman <sup>16</sup>                    | 1992 | rd, db, pl | FLU 400 mg<br>placebo                   | 179 | 48 alloSCT                                                  | 3                         | N/A        | N/A        | 30.7      | 0.6      |
|                                          |      |            |                                         | 177 | 52 autoSCT                                                  | 16                        | N/A        | N/A        | 26        | 5.6      |
| Rotstein,<br>Laverdière <sup>21,31</sup> | 1999 | rd, db, pl | FLU 400 mg<br>placebo                   | 141 | 50 AML                                                      | 2.8                       | 3.5        | 36         | 11        | 0.7      |
|                                          |      |            |                                         | 133 | 10 ALL<br>31 other hematomol<br>9 solid tumor<br>44 autoSCT | 16.5                      | 7.5        | 26         | 11        | 4.5      |
| Schaffner <sup>22</sup>                  | 1995 | rd, db, pl | FLU 400 mg<br>placebo                   | 75  | 72 AML                                                      | 8                         | 2.7        | 6.6        | 5.3       | 2.6      |
|                                          |      |            |                                         | 76  | 28 NHL relapse<br>10 autoSCT                                | 9.2                       | 1.3        | 7.9        | 6.6       | 2.6      |
| Slavin, Marr <sup>18,19</sup>            | 1995 | rd, db, pl | FLU 400 mg<br>placebo                   | 152 | 20 AML                                                      | 7                         | —          | 38         | 20        | 13       |
|                                          |      |            |                                         | 148 | 10 ALL<br>55 NHL/HD<br>15 other<br>88 alloSCT<br>12 autoSCT | 18                        | —          | 55         | 35        | 21       |
| Winston <sup>23</sup>                    | 1993 | rd, db, pl | FLU 400 mg<br>placebo                   | 123 | 80 AML                                                      | 4                         | N/A        | N/A        | 0.8       | 0        |
|                                          |      |            |                                         | 132 | 20 ALL                                                      | 8                         | N/A        | N/A        | 3         | 0        |
| MacMillan <sup>31</sup>                  | 2002 | rd         | FLU 400 mg<br>FLU 200 mg                | 124 | 36 AL                                                       | 7.3                       | N/A        | N/A        | N/A       | N/A      |
|                                          |      |            |                                         | 129 | 25 CML<br>17 NHL/HD<br>22 other<br>56 alloSCT<br>44 autoSCT | 2.3                       | N/A        | N/A        | N/A       | N/A      |

continuing on next page

|                          |      |                |                                                                                                       |                |                                                                          |                                 |                                 |                                 |                                 |            |
|--------------------------|------|----------------|-------------------------------------------------------------------------------------------------------|----------------|--------------------------------------------------------------------------|---------------------------------|---------------------------------|---------------------------------|---------------------------------|------------|
| Ullmann <sup>29</sup>    | 2007 | rd, db         | FLU 400 mg<br>POS 600 mg                                                                              | 299<br>301     | 100 alloSCT                                                              | 7<br>2.3                        | 2<br>3                          | 28.1<br>25.2                    | 4<br>1                          |            |
| Cornely <sup>28</sup>    | 2007 | rd             | FLU 400 mg OR<br>ITR 400 mg oral sol<br>POS 600 mg                                                    | 298<br>304     | 86 AML<br>14 MDS                                                         | 8.4<br>2.3                      | N/A<br>N/A                      | 22.5<br>16.1                    | 5.4<br>1.7                      |            |
| Winston <sup>38</sup>    | 2003 | rd             | FLU 400 mg i.v./p.o.<br>ITR d1-2: 400 mg i.v.,<br>d3-: 200 mg i.v. or 400 mg sol                      | 67<br>71       | 100 alloSCT                                                              | 25.4<br>8.5                     | N/A<br>N/A                      | N/A<br>N/A                      | 17.9<br>8.5                     |            |
| Glasmacher <sup>37</sup> | 2006 | rd             | FLU 400 mg sol<br>ITR 5 mg/kg sol                                                                     | 246<br>248     | 72.9 AML<br>12.1 ALL<br>15 other                                         | 2<br>1.6                        | 11.4<br>8.9                     | 11.4<br>10.1                    | 1.2<br>0.8                      |            |
| Marr <sup>39</sup>       | 2004 | rd             | FLU 400 mg i.v./p.o.<br>ITR 200 mg i.v./<br>7.5 mg/kg sol                                             | 148<br>149     | 100 alloSCT                                                              | 16.2<br>12.1                    | N/A<br>N/A                      | 39.2<br>30.9                    | 8<br>7.4                        |            |
| van Burik <sup>69</sup>  | 2004 | rd, db, pl     | FLU 400 mg i.v.<br>MIC 50 mg                                                                          | 457<br>425     | 14 AML<br>3 ALL<br>12 CML<br>24 NHL<br>20 MM<br>46 autoSCT<br>54 alloSCT | 26.5<br>20                      |                                 | 5.7<br>4.2                      | 0.4<br>0.2                      |            |
| Wingard <sup>46</sup>    | 2007 | rd, db, abs    | FLU 400 mg<br>VCZ 400 mg                                                                              |                | 38 AML<br>20 ALL<br>17 CML<br>25 other<br>100 alloSCT                    | N/A<br>N/A<br>N/A<br>N/A<br>N/A | N/A<br>N/A<br>N/A<br>N/A<br>N/A | N/A<br>N/A<br>N/A<br>N/A<br>N/A | N/A<br>N/A<br>N/A<br>N/A<br>N/A |            |
| Oren <sup>92</sup>       | 2006 | rd             | FLU 400 mg<br>ITR 400 mg oral sol or<br>ITR 200 mg IV                                                 | 99<br>96       | 31 AML<br>5 ALL<br>23 NHL<br>4 HD<br>55 autoSCT<br>19 alloSCT            | 2<br>1                          | 6<br>5.2                        | 1<br>3.1                        | 11.1<br>9.4                     | 9.1<br>5.2 |
| Mattiuzzi <sup>33</sup>  | 2003 | rd             | FLU 400 mg + ITR 400 mg cps<br>L-AmB 3 mg/kg i.v. tiw                                                 | 67<br>70       | 100 AML                                                                  | 4.5<br>4.3                      | N/A<br>N/A                      | 16<br>8.6                       | 11.9<br>14.3                    | 1.5<br>1.4 |
| Yamac <sup>94</sup>      | 1995 | rd             | FLU 400 mg<br>No prophylaxis                                                                          | 41<br>29       | N/A                                                                      | 9.8<br>31                       |                                 | N/A<br>N/A                      | N/A<br>N/A                      |            |
| Bodey <sup>70</sup>      | 1994 | rd             | FLU 400 mg<br>AmB 0.5 mg/kg tiw i.v.                                                                  | 41<br>36       | 94 AML<br>6 ALL                                                          | 4.8<br>8.3                      | 7.3<br>19.4                     | 4.8<br>2.7                      | 14.6<br>25                      | 0<br>2.7   |
| Egger <sup>60</sup>      | 1995 | rd             | FLU 400 mg p.o./i.v.<br>NYS 72 Mill IU + MCZ inh.<br>(dose N/A)                                       | 43<br>46       | 46 AL<br>16 NHL/HD<br>38 other                                           | 2.3<br>4.3                      |                                 | N/A<br>N/A                      | 2.3<br>0                        |            |
| Kern <sup>95</sup>       | 1998 | rd             | FLU 400 mg + AmB 240 mg<br>AmB 240 mg                                                                 | 36<br>32       | 100 AML-Rez.                                                             | 5.6<br>6.3                      | 0<br>0                          | 53<br>34                        | 22<br>19                        | 0<br>0     |
| Wolff <sup>69</sup>      | 2000 | rd             | FLU 400 mg<br>AmB 0.2 mg/kg i.v.                                                                      | 196<br>159     | 103 alloSCT<br>252 autoSCT                                               | 4.1<br>7.5                      | N/A<br>N/A                      | N/A<br>N/A                      | 12.2<br>11.9                    | 2.6<br>1.3 |
| Hashino <sup>96</sup>    | 2008 | hist contr     | FLU 400 p.o. OR i.v.<br>MIC 100 mg                                                                    | 29<br>44       | 27 AML<br>19 ALL<br>54% other<br>100% alloSCT                            | 6.9<br>0                        | 3.4<br>0                        | 24.1<br>11.4                    | 10.3<br>9.1                     | 6.9<br>0   |
| Annaloro <sup>97</sup>   | 1995 | rd, hist contr | FLU 300 mg + NYS<br>(dose N/A)<br>FLU 50 mg + NYS<br>(dose N/A)<br>ITR 400 mg cps + NYS<br>(dose N/A) | 28<br>30<br>31 | 35 alloSCT<br>65 autoSCT                                                 | 3.6<br>3.3<br>12.9              | 7.1<br>6.6<br>3.2               | 7.1<br>3.3<br>6.4               | 0<br>0<br>0                     |            |
| Ito <sup>98</sup>        | 2007 | rd             | FLU 200 mg<br>ITR 200 mg cps                                                                          | 110<br>108     | 100 AML/MDS                                                              | 0<br>0                          | 7.3<br>0                        | 2.7<br>3.7                      | N/A<br>N/A                      | N/A<br>N/A |
| Akayima <sup>99</sup>    | 1993 | rd             | FLU 200 mg<br>AmB 2.4 g                                                                               | 71<br>59       | 80 AML<br>18 ALL<br>2 NHL                                                | 1.4<br>3.4                      | N/A<br>N/A                      | N/A<br>N/A                      | N/A<br>N/A                      | N/A<br>N/A |
| Young <sup>24</sup>      | 1999 | rd, db, pl     | FLU 200 mg<br>NYS 6 Mill IU                                                                           | 86<br>78       | 68 AML<br>25 ALL<br>7 other                                              | 4.7<br>7.7                      | N/A<br>N/A                      | 16<br>24                        | 7<br>14                         | 2<br>4     |

continuing on next page

|                                                                           |      |            |                                                                                                              |            |                                                            |              |            |            |              |             |
|---------------------------------------------------------------------------|------|------------|--------------------------------------------------------------------------------------------------------------|------------|------------------------------------------------------------|--------------|------------|------------|--------------|-------------|
| Ellis <sup>61</sup>                                                       | 1994 | rd         | FLU 200 mg<br>CLO 20 mg + NYS 2 Mill IU                                                                      | 42<br>48   | 47 AML<br>30 ALL<br>8 NHL/HD<br>16 other<br>26 alloSCT     | 4.8<br>21    | 2.3<br>2.1 | N/A<br>N/A | N/A<br>N/A   | 4.8<br>18.8 |
| Meunier <sup>100</sup>                                                    | 1991 | hist contr | FLU 200 mg<br>AmB 430 mg                                                                                     | 30<br>29   | 68 AL<br>22 NHL/HD<br>10 other                             | 13.3<br>17.2 | N/A<br>N/A | N/A<br>N/A | 16.7<br>27.6 | 3.3<br>10.3 |
| Timmers <sup>84</sup>                                                     | 2000 | rd         | FLU 200 mg<br>ABCD 2 mg/kg i.v.                                                                              | 12<br>12   | 25 AML<br>8 ALL<br>67 other haematol                       | 0<br>0       | N/A<br>N/A | N/A<br>N/A | 0<br>17      | 0<br>0      |
| Takatsuka <sup>101</sup>                                                  | 1999 | hist contr | FLU 200 mg + AmB sol<br>300 mg + AmB inh. (dose N/A)<br>AmB 300 mg + AmB sol<br>300 mg + AmB inh. (dose N/A) | 54<br>70   | 46 AML<br>18 ALL<br>19 NHL<br>5 CML                        | 0<br>7       | N/A<br>N/A | N/A<br>N/A | N/A<br>N/A   | N/A<br>N/A  |
| Ninane <sup>102</sup>                                                     | 1994 | rd         | FLU 3 mg/kg<br>NYS 0.2 Mill IU/kg<br>+/- AmB 100 mg/kg                                                       | 245<br>257 | 53 AL<br>12 NHL/HD<br>30 solid tumor<br>5 other            | 0.8<br>1.9   | N/A<br>N/A | N/A<br>N/A | 1.2<br>2.3   | N/A         |
| Groll <sup>103</sup>                                                      | 1997 | rd         | FLU 3 mg/kg<br>NYS 50.000 IU/kg                                                                              | 25<br>25   | N/A                                                        | 4<br>0       | 4<br>8     | N/A<br>N/A | N/A<br>N/A   | N/A<br>N/A  |
| Alangaden <sup>104</sup>                                                  | 1994 | hist contr | FLU 100/200 mg<br>no prophylaxis                                                                             | 112<br>79  | 50 AL<br>36 NHL/HD<br>15 other<br>67 alloSCT<br>33 autoSCT | 3.6<br>10.1  | N/A<br>N/A | N/A<br>N/A | 8.9<br>17.7  | 0.9<br>3.8  |
| Menichetti <sup>25</sup>                                                  | 1994 | rd         | FLU 150 mg<br>AmB 2g sol                                                                                     | 420<br>400 | 81 AML<br>19 ALL                                           | 2.6<br>2.5   | N/A<br>N/A | 16<br>21   | 10.5<br>10   | 1.2<br>0.8  |
| Huijgens <sup>27</sup>                                                    | 1999 | rd, db     | FLU 100 mg<br>ITR 200 mg cps                                                                                 | 101<br>101 | 39 AL<br>61 other haematol                                 | 4<br>4       | 7<br>4     | 1<br>2     | 7<br>11      | 3<br>6      |
| Morgenstern <sup>26</sup>                                                 | 1999 | rd         | FLU 100 mg<br>ITR 5 mg/kg sol                                                                                | 293<br>288 | 53 AML<br>12 ALL<br>35 other haematol                      | 2<br>0.3     | 2.4<br>3.1 | N/A<br>N/A | N/A<br>N/A   | 2.4<br>0    |
| Philpott-Howard, 1993<br>Brammer,<br>Rozenberg-Arska <sup>17,62,105</sup> |      | rd         | FLU 50 mg<br>AmB 2g sol or NYS 4 Mill IU                                                                     | 256<br>255 | 76 AL<br>22 other haematol<br>2 solid tumor<br>21 alloSCT  | 2.4<br>3.5   | N/A<br>N/A | N/A<br>N/A | N/A<br>N/A   | N/A<br>N/A  |
| Finke <sup>106</sup>                                                      | 1990 | rd         | FLU 50 mg<br>AmB 800 mg                                                                                      | 19<br>21   | N/A                                                        | N/A<br>N/A   | N/A<br>N/A | N/A<br>N/A | 15.8<br>9.5  | N/A<br>N/A  |

Medication given p.o. and dosing interval qd unless otherwise stated, abs = abstract, ABCD: amphotericin B colloidal dispersion; AmB: amphotericin B; CAS: caspofungin; CLO: clotrimazole; db = double blind, FLU = fluconazole; HEPA: high-efficiency particulate air filters, hist contr = historical control group, inh. = inhalation, ITR = itraconazole, LAF = laminar air-flow, N/A = data not available, KTC: ketoconazole; MCZ = miconazole, MIC = micafungin; sol = oral solution, NYS = nystatin, pl = placebo controlled, rd = randomised, tiw denotes thrice weekly.

Table S2. Itraconazole prophylaxis.

| Author                     | Year | Design          | Medication/daily dose per treatment arm                                                      | n=  | Risk factors %                         | Invasive fungal infection |            |            | Mortality |          |
|----------------------------|------|-----------------|----------------------------------------------------------------------------------------------|-----|----------------------------------------|---------------------------|------------|------------|-----------|----------|
|                            |      |                 |                                                                                              |     |                                        | Proven %                  | Probable % | Possible % | Total %   | Fungal % |
| Winston <sup>38</sup>      | 2003 | rd              | ITR d1-2: 400 mg i.v.,<br>d3-: 200 mg i.v. or 400 mg sol<br>FLU 400 mg i.v./p.o.             | 71  | 100 alloSCT                            | 8.5                       | N/A        | N/A        | N/A       | 8.5      |
|                            |      |                 |                                                                                              | 67  |                                        | 25.4                      | N/A        | N/A        | N/A       | 17.9     |
| Mattiuzzi <sup>87</sup>    | 2006 | rd              | ITR 400 mg i.v. (d1-2),<br>200 mg i.v. (d3-) CAS 50 mg                                       | 90  | 75 AML                                 | 5.5                       | N/A        | N/A        | 7.8       | 2.2      |
|                            |      |                 |                                                                                              | 107 | 25 MDS                                 | 6.5                       | N/A        | N/A        | 6.5       | 3.7      |
| Oren <sup>92</sup>         | 2006 | rd              | ITR 400 mg oral sol<br>or ITR 200 mg IV FLU 400 mg                                           | 96  | 31 AML, 5 ALL                          | 1                         | 5.2        | 3.1        | 9.4       | 5.2      |
|                            |      |                 |                                                                                              | 99  | 23 NHL, 4 HD<br>55 autoSCT, 19 alloSCT | 2                         | 6          | 1          | 11.1      | 9.1      |
| Marr <sup>39</sup>         | 2004 | rd              | ITR 200 mg i.v./ 7.5 mg/kg sol<br>FLU 400 mg i.v./p.o.                                       | 149 | 100 alloSCT                            | 12.1                      | N/A        | N/A        | 30.9      | 7.4      |
|                            |      |                 |                                                                                              | 148 |                                        | 16.2                      | N/A        | N/A        | 39.2      | 8.0      |
| Cornely <sup>28</sup>      | 2007 | rd              | FLU 400 mg OR ITR 400 mg oral sol<br>POS 600 mg                                              | 298 | 86 AML                                 | 8.4                       | N/A        | N/A        | 22.5      | 5.4      |
|                            |      |                 |                                                                                              | 304 | 14 MDS                                 | 2.3                       | N/A        | N/A        | 16.1      | 1.7      |
| Lass-Flörl <sup>107</sup>  | 2003 | rd              | ITR 10 mg/kg sol<br>AmB 3g                                                                   | 56  | 49 AML, 29 ALL                         | 1.8                       | 5.4        | 5.4        | 5.4       | 0        |
|                            |      |                 |                                                                                              | 59  | 22 other                               | 6.8                       | 5.1        | 5.1        | 5.1       | 3.4      |
| Böhme <sup>72</sup>        | 2000 | hist contr      | ITR 400 mg sol<br>AmB 0.5 mg/kg/tiw i.v.                                                     | 72  | 87 AML, 9 ALL                          | 16.7                      | 8.3        | 4.1        | N/A       | N/A      |
|                            |      |                 |                                                                                              | 61  | 4 other                                | 0                         | 9.3        | 1.6        | N/A       | N/A      |
| Harousseau <sup>108</sup>  | 2000 | rd, db, pl      | ITR 5 mg/kg sol<br>AmB 2 g cps                                                               | 281 | 57 AML, 13 ALL                         | 2.8                       | 30         | 6          | 6         | 0.4      |
|                            |      |                 |                                                                                              | 276 | 29 other                               | 4.7                       | 29         | 8          | 8         | 1.8      |
| Menichetti <sup>35</sup>   | 1999 | rd, db, pl      | ITR 5 mg sol + NYS 2 Mill. IU<br>placebo + NYS 2 Mill. IU                                    | 201 | 76 AL                                  | 2.5                       | 21         | 7.5        | 7.5       | 0.5      |
|                            |      |                 |                                                                                              | 204 | 24 other                               | 4.4                       | 29         | 8.8        | 8.8       | 2.5      |
| Glasmacher <sup>37</sup>   | 2006 | Rd              | ITR 5 mg/kg sol<br>FLU 400 mg sol                                                            | 248 | 72.9 AML                               | 1.6                       | 8.9        | 10.1       | 10.1      | 0.8      |
|                            |      |                 |                                                                                              | 246 | 12.1 ALL, 15 other                     | 2                         | 11.4       | 11.4       | 11.4      | 1.2      |
| Morgenstern <sup>26</sup>  | 1999 | rd              | ITR 5 mg/kg sol<br>FLU 100 mg                                                                | 288 | 53 AML, 12 ALL                         | 0.3                       | 3.1        | N/A        | N/A       | 0        |
|                            |      |                 |                                                                                              | 293 | 35 other                               | 2                         | 2.4        | 2.4        | 2.4       | 2.4*     |
| Boogaerts <sup>36</sup>    | 2001 | rd              | ITR 200 mg sol<br>AmB 1.5 g + NYS 2 Mill IU                                                  | 144 | 66 AML                                 | 4.9                       | 2.8        | 11.8       | 11.8      | 4.2      |
|                            |      |                 |                                                                                              | 133 | 9 SCT                                  | 5.3                       | 3.8        | 12.8       | 12.8      | 4.5      |
| Glasmacher <sup>42</sup>   | 1998 | hist contr      | ITR 400/600 mg cps + AmB Sol<br>2.4 g or NYS 24 Mill. IU<br>AmB 2.4g sol or NYS 24 Mill. IU  | 47  | ~85 AML                                | N/A                       | N/A        | N/A        | 17.9      | 0.9      |
|                            |      |                 |                                                                                              | 76  | ~15 ALL<br>~22 AL relapse              | N/A                       | N/A        | N/A        | 25        | 8.8      |
| Mattiuzzi <sup>33</sup>    | 2003 | rd              | ITR 400 mg cps + FLU 400 mg<br>L-AmB 3 mg/kg i.v. tiw                                        | 67  | 100 AML                                | 4.5                       | N/A        | 16         | 11.9      | 1.5      |
|                            |      |                 |                                                                                              | 70  |                                        | 4.3                       | N/A        | 8.6        | 14.3      | 1.4      |
| Kaptan <sup>109</sup>      | 2003 | rd              | ITR 400 mg cps<br>no prophylaxis                                                             | 31  | 56 AML                                 | 6.5                       | 6.5        | N/A        | 16.1      | 0        |
|                            |      |                 |                                                                                              | 24  | 44 ALL                                 | 8.3                       | 16.7       | N/A        | 8.3       | 0        |
| Vreugdenhil <sup>110</sup> | 1993 | rd, db, pl      | ITR 400 mg cps + AmB 4 g sol<br>placebo + AmB 4g sol                                         | 46  | 64 AML                                 | 10.9                      | 4.3        | 6.5        | 21.7      | 15.2     |
|                            |      |                 |                                                                                              | 46  | 24 ALL, 12 other                       | 19.6                      | 2.2        | 10.9       | 30.4      | 15.2     |
| Annaloro <sup>97</sup>     | 1995 | rd, hist contr  | ITR 400 mg cps + NYS (dose N/A)<br>FLU 300 mg + NYS (dose N/A)<br>FLU 50 mg + NYS (dose N/A) | 31  | 35 alloSCT                             | 12.9                      | 3.2        | 6.4        | 6.4       | 0        |
|                            |      |                 |                                                                                              | 28  | 65 autoSCT                             | 3.6                       | 7.1        | 7.1        | 7.1       | 0        |
|                            |      |                 |                                                                                              | 30  |                                        | 3.3                       | 6.6        | 3.3        | 3.3       | 0        |
| Böhme <sup>111</sup>       | 1996 | hist contr      | ITR 400 mg cps<br>AmB 0.8 g p.o.                                                             | 241 | 65 AML, 12 ALL                         | 4.6                       | 0.5        | 1.5        | N/A       | N/A      |
|                            |      |                 |                                                                                              | 223 | 23 other                               | 5.4                       | 0.9        | 1.3        | N/A       | N/A      |
| Thunnissen <sup>112</sup>  | 1991 | hist contr      | ITR 400 mg cps<br>NYS 10 Mill IU                                                             | 47  | 75 AML                                 | 0                         | N/A        | N/A        | 8.5       | 0        |
|                            |      |                 |                                                                                              | 47  | 25 ALL/NHL                             | 9                         | N/A        | N/A        | 26        | 13       |
| Tricot <sup>113</sup>      | 1987 | hist contr      | ITR 400 mg cps<br>KTC 400 mg                                                                 | 45  | 68 AML                                 | 24                        | 5.5        | N/A        | 24        | 15.5     |
|                            |      |                 |                                                                                              | 52  | 26 ALL<br>6 other                      | 44.5                      | 8.5        | N/A        | 40.5      | 36.5     |
| Lamy <sup>114</sup>        | 1998 | non-comparative | ITR 400 mg cps + LAF                                                                         | 96  | 45 AML<br>10 ALL<br>45 other           | 2                         | 3          | N/A        | N/A       | 0        |
| Nucci <sup>33</sup>        | 2000 | rd, db, pl      | ITR 200 mg cps<br>placebo                                                                    | 104 | 60 AML                                 | 4.8                       | N/A        | N/A        | 7.7       | 1.9      |
|                            |      |                 |                                                                                              | 106 | 20 ALL<br>20 other                     | 8.5                       | N/A        | N/A        | 6.6       | 0.9      |
| Huijgens <sup>27</sup>     | 1999 | rd, db          | ITR 200 mg cps<br>FLU 100 mg                                                                 | 101 | 39 AL                                  | 4                         | 4          | 2          | 11        | 6        |
|                            |      |                 |                                                                                              | 101 | 61 other                               | 4                         | 7          | 1          | 7         | 3        |
| Ito <sup>98</sup>          | 2007 | rd              | ITR 200 mg cps<br>FLU 200 mg                                                                 | 108 | 100 AML/MDS                            | 0                         | 0          | 3.7        | N/A       | N/A      |
|                            |      |                 |                                                                                              | 110 |                                        | 0                         | 7.3        | 2.7        | N/A       | N/A      |
| Todeschini <sup>115</sup>  | 1993 | hist contr      | ITR 200 mg cps + AmB<br>intranasal 10 mg<br>no prophylaxis                                   | 164 | 31 AML<br>13 ALL                       | 2.4                       | 4.9        | N/A        | N/A       | 1.2      |
|                            |      |                 |                                                                                              | 290 | 41 NHL/HD<br>15 other<br>6 autoSCT     | 6.6                       | 7.6        | N/A        | N/A       | 3.8      |

For abbreviations refer to Table S1.

**Table S3. Posaconazole and voriconazole prophylaxis.**

| Author                     | Year | Design      | Medication/daily dose per treatment arm         | n=  | Risk factors % | Invasive fungal infection |            |            | Mortality |          |
|----------------------------|------|-------------|-------------------------------------------------|-----|----------------|---------------------------|------------|------------|-----------|----------|
|                            |      |             |                                                 |     |                | Proven %                  | Probable % | Possible % | Total %   | Fungal % |
| Cornely <sup>28</sup>      | 2007 | rd          | POS 600 mg<br>FLU 400 mg OR ITR 400 mg oral sol | 304 | 86 AML         | 2.3                       | —          | N/A        | 16.1      | 1.7      |
|                            |      |             |                                                 | 298 | 14 MDS         | 8.4                       | —          | N/A        | 22.5      | 5.4      |
| Ullmann <sup>29</sup>      | 2007 | rd, db      | POS 600 mg<br>FLU 400 mg                        | 301 | 100 alloSCT    | 2.3                       | —          | 3          | 25.2      | 1        |
|                            |      |             |                                                 | 299 |                | 7                         | —          | 2          | 28.1      | 4        |
| Vehreschild <sup>116</sup> | 2007 | rd, db, pl  | VCZ 400 mg<br>placebo                           | 10  | 100 AML        | 0                         | 0          | 0          | 0         | 0        |
|                            |      |             |                                                 | 15  |                | 0                         | 26.7       | 33         | 13.3      | 0        |
| Wingard <sup>46</sup>      | 2007 | rd, db, abs | VCZ 400 mg<br>FLU 400 mg                        |     | 38 AML         | N/A                       | N/A        | N/A        | N/A       | N/A      |
|                            |      |             |                                                 |     | 20 ALL         | N/A                       | N/A        | N/A        | N/A       | N/A      |
|                            |      |             |                                                 |     | 17 CML         | N/A                       | N/A        | N/A        | N/A       | N/A      |
|                            |      |             |                                                 |     | 25 other       | N/A                       | N/A        | N/A        | N/A       | N/A      |
|                            |      |             |                                                 |     | 100 alloSCT    | N/A                       | N/A        | N/A        | N/A       | N/A      |

For abbreviations refer to Table S1.

**Table S4. Ketoconazole, miconazole and clotrimazole prophylaxis.**

| Author                 | Year | Design     | Medication/daily dose per treatment arm                                                          | n= | Risk factors %                     | Invasive fungal infection |            |            | Mortality |          |
|------------------------|------|------------|--------------------------------------------------------------------------------------------------|----|------------------------------------|---------------------------|------------|------------|-----------|----------|
|                        |      |            |                                                                                                  |    |                                    | Proven %                  | Probable % | Possible % | Total %   | Fungal % |
| Brincker <sup>90</sup> | 1983 | rd, db, pl | KTC 400 mg<br>placebo                                                                            | 19 | 100 AL                             | 10.5                      | N/A        | N/A        | N/A       | N/A      |
|                        |      |            |                                                                                                  | 19 |                                    | 10.5                      | N/A        | N/A        | N/A       | N/A      |
| Hansen <sup>54</sup>   | 1987 | rd, db, pl | KTC 400 mg<br>placebo                                                                            | 27 | 59 AL                              | N/A                       | N/A        | N/A        | N/A       | N/A      |
|                        |      |            |                                                                                                  | 29 | 9 NHL/HD                           | N/A                       | N/A        | N/A        | N/A       | N/A      |
|                        |      |            |                                                                                                  |    | 13 autoSCT<br>21 other             | N/A                       | N/A        | N/A        | N/A       | N/A      |
| Donnelly <sup>61</sup> | 1984 | rd         | KTC 400 mg<br>AmB tab 400 mg and 70 mg loz<br>KTC 400 mg + AmB tab 400 mg<br>+ 70 mg loz         | 17 | 94 AL                              | 5.9                       | N/A        | 23.5       | 5.9       | 5.9      |
|                        |      |            |                                                                                                  | 19 | 6 alloBMT                          | 5.3                       | N/A        | 10.5       | 5.3       | 5.3      |
|                        |      |            |                                                                                                  | 12 |                                    | 0                         | N/A        | 25.0       | 0         | 0        |
|                        |      |            |                                                                                                  |    |                                    |                           |            |            |           |          |
| Shepp <sup>56</sup>    | 1985 | rd         | KTC 400 mg<br>NYS 3 Mill IU                                                                      | 27 | 96 alloBMT                         | 0                         | N/A        | N/A        | 7.4       | 0        |
|                        |      |            |                                                                                                  | 29 | 4 autoSCT                          | 6.9                       | N/A        | N/A        | 17.2      | 6.9      |
| Tricot <sup>113</sup>  | 1987 | hist contr | KTC 400 mg<br>ITR 400 mg cps                                                                     | 52 | 68 AML                             | 44.5                      | 8.5        | N/A        | 40.5      | 36.5     |
|                        |      |            |                                                                                                  | 45 | 26 ALL<br>6 other                  | 24                        | 5.5        | N/A        | 24        | 15.5     |
| Vogler <sup>67</sup>   | 1987 | rd         | KTC 400 mg<br>NYS 2 Mill IU                                                                      | 22 | 89 AL                              | 22.7                      | —          | 22.7       | N/A       | N/A      |
|                        |      |            |                                                                                                  | 24 |                                    | 33.3                      | —          | 16.7       |           |          |
| Estey <sup>62</sup>    | 1984 | rd         | TMP 320 mg + SMX 1.6 g<br>KTC 400 mg<br>KTC 400 mg + TMP 320 mg<br>+ SMX 1.6 g<br>no prophylaxis | 32 | N/A                                | 15.6                      | N/A        | N/A        | 21.9      | 16       |
|                        |      |            |                                                                                                  | 32 |                                    | 0                         | N/A        | N/A        | 21.9      | 0        |
|                        |      |            |                                                                                                  | 45 |                                    | 11.1                      | N/A        | N/A        | 13.3      | 6.7      |
|                        |      |            |                                                                                                  | 38 |                                    | 2.6                       | N/A        | N/A        | 15.8      | 0        |
| Hann <sup>53</sup>     | 1982 | rd         | KTC 200/400 mg<br>AmB 40 mg loz + NYS 1 Mill IU                                                  | 37 | 83 AL                              | 0                         | N/A        | 8.1        | 10.8      | 0        |
|                        |      |            |                                                                                                  | 35 | 17 other                           | 5.7                       | N/A        | 5.7        | 25.7      | 5.7      |
| Jones <sup>55</sup>    | 1984 | rd         | KTC 200 mg<br>NYS 2 Mill IU                                                                      | 18 | 72 AL                              | 5.5                       | N/A        | N/A        | N/A       | N/A      |
|                        |      |            |                                                                                                  | 18 | 28 NHL/HD                          | 0                         | N/A        | N/A        | N/A       | N/A      |
| Palmbad <sup>58</sup>  | 1992 | rd, db, pl | KTC 200 mg<br>placebo                                                                            | 50 | 100 AL                             | 6                         | N/A        | N/A        | N/A       | 6        |
|                        |      |            |                                                                                                  | 57 |                                    | 1.8                       | N/A        | N/A        | N/A       | 0        |
| Brincker <sup>99</sup> | 1978 | rd, db, pl | MCZ 2 g p.o.<br>placebo                                                                          | 15 | 100 AL                             | 6.7                       | N/A        | N/A        | N/A       | N/A      |
|                        |      |            |                                                                                                  | 15 |                                    | 13.3                      | N/A        | N/A        | N/A       | N/A      |
| Egger <sup>60</sup>    | 1995 | rd         | NYS 72 Mill IU + MCZ inh. (dose N/A)<br>FLU 400 mg p.o./i.v.                                     | 46 | 46 AL                              | —                         | 4.3        | —          | N/A       | 0        |
|                        |      |            |                                                                                                  | 43 | 16 NHL/HD<br>38 other              | —                         | 2.3        | —          | N/A       | 2.3      |
| Ellis <sup>61</sup>    | 1994 | Rd         | CLO 20 mg + NYS 2 Mill IU<br>FLU 200 mg                                                          | 48 | 77 AL                              | 21                        | 2.1        | N/A        | N/A       | 18.8     |
|                        |      |            |                                                                                                  | 42 | 8 NHL/HD<br>16 other<br>26 alloSCT | 4.8                       | 2.3        | N/A        | N/A       | 4.8      |

For abbreviations refer to Table S1.

**Table S5.** Prophylaxis with systemic amphotericin B deoxycholate and lipid-based formulations.

| Author                                | Year | Design           | Medication /daily dose per treatment arm              | n=  | Risk factors %                      | Invasive fungal infection |           |           | Mortality |          |
|---------------------------------------|------|------------------|-------------------------------------------------------|-----|-------------------------------------|---------------------------|-----------|-----------|-----------|----------|
|                                       |      |                  |                                                       |     |                                     | Proven%                   | Probable% | Possible% | Total %   | Fungal % |
| Karthaus, Doellmann <sup>71,116</sup> | 1999 | hist contr       | AmB 1 mg/kg/48h i.v. no prophylaxis                   | 104 | 100 ALL                             | 0                         | 18.3      | 12.5      | N/A       | N/A      |
|                                       |      |                  |                                                       | 104 |                                     | 4.8                       | 34.6      | 19.2      | N/A       | N/A      |
| Bodey <sup>70</sup>                   | 1994 | rd               | AmB 0.5 mg/kg i.v. tiw<br>FLU 400 mg                  | 36  | 94 AML                              | 8.3                       | 19.4      | 2.7       | 25        | 2.7      |
|                                       |      |                  |                                                       | 41  | 6 ALL                               | 4.8                       | 7.3       | 4.8       | 14.6      | 0        |
| Böhme <sup>72</sup>                   | 2000 | hist contr       | AmB 0.5 mg/kg i.v. tiw<br>ITR 400 mg sol              | 61  | 87 AML                              | 0                         | 9.3       | 1.6       | N/A       | N/A      |
|                                       |      |                  |                                                       | 72  | 9 ALL                               | 16.7                      | 8.3       | 4.1       | N/A       | N/A      |
|                                       |      |                  |                                                       |     | 4 other                             |                           |           |           |           |          |
| Rousey <sup>117</sup>                 | 1991 | hist contr       | AmB 20 mg i.v. + LAF<br>LAF<br>no prophylaxis         | 110 | 100 alloSCT                         | 9                         | N/A       | N/A       | 20        | 6        |
|                                       |      |                  |                                                       | 48  |                                     | 23                        | N/A       | N/A       | 35        | 13       |
|                                       |      |                  |                                                       | 28  |                                     | 25                        | N/A       | N/A       | 46        | 18       |
| Wolff <sup>69</sup>                   | 2000 | rd               | AmB 0.2 mg/kg/d i.v.<br>FLU 400 mg                    | 159 | 103 alloSCT                         | 7.5                       | N/A       | N/A       | 11.9      | 1.3      |
|                                       |      |                  |                                                       | 196 | 252 autoSCT                         | 4.1                       | N/A       | N/A       | 12.2      | 2.6      |
| Riley <sup>118</sup>                  | 1994 | rd, db, pl       | AmB 0.1 mg/kg i.v. + LAF 82%<br>placebo + LAF 44%     | 17  | 86 haematol                         | 0                         | N/A       | 29        | 0         | 0        |
|                                       |      |                  |                                                       | 18  | 14 solid tumor<br>69 alloSCT        | 28                        | N/A       | 44        | 22        | 11       |
| Perfect <sup>68</sup>                 | 1992 | rd, bl, pl       | AmB 0.1 mg/kg i.v. + HEPA<br>placebo + HEPA           | 91  | 100 autoSCT                         | 1.1%                      | N/A       | N/A       | 3.3       | 0        |
|                                       |      |                  |                                                       | 91  | 4 haematol                          | 9.9%                      | N/A       | N/A       | 12.1      | 2.2      |
|                                       |      |                  |                                                       |     | 96 solid tumor                      |                           |           |           |           |          |
| Mattiuzzi <sup>33</sup>               | 2003 | rd               | L-AmB 3 mg/kg i.v. tiw<br>FLU 400 mg + ITR cps 400 mg | 70  | 100 AML                             | 4.3                       | N/A       | 8.6       | 14.3      | 1.4      |
|                                       |      |                  |                                                       | 67  |                                     | 4.5                       | N/A       | 16        | 11.9      | 1.5      |
| Kelsey <sup>61</sup>                  | 1999 | rd, db, pl       | L-AmB 2 mg/kg i.v. tiw<br>placebo                     | 74  | 27 AML                              | 0                         | — 28.3 —  |           | 15        | 2.7      |
|                                       |      |                  |                                                       | 87  | 12 ALL                              | 2.3                       | — 35.6 —  |           | 14        | 2.3      |
|                                       |      |                  |                                                       |     | 34 CML                              |                           |           |           |           |          |
|                                       |      |                  |                                                       |     | 22 NHL/HD                           |                           |           |           |           |          |
|                                       |      |                  |                                                       |     | 5 other<br>53 alloSCT<br>31 autoSCT |                           |           |           |           |          |
| Tollema <sup>76,79</sup>              | 1993 | rd, db, pl       | L-AmB 1.0 mg/kg i.v.<br>placebo                       | 36  | 25 AML                              | 3                         | — 14 —    |           | 44        | 3        |
|                                       |      |                  |                                                       | 40  | 22 ALL                              | 8                         | — 18 —    |           | 36        | 8        |
|                                       |      |                  |                                                       |     | 42 other                            |                           |           |           |           |          |
|                                       |      |                  |                                                       |     | 5 solid tumor<br>83 alloSCT         |                           |           |           |           |          |
| Penack <sup>62</sup>                  | 2006 | rd               | L-AmB 50 mg q48h<br>no prophylaxis                    | 75  | 65 AML                              | — 6.7 —                   | N/A       | 5.3       | 2.7       |          |
|                                       |      |                  |                                                       | 57  | 14 ALL                              | — 35.1 —                  | N/A       | 14        | 12.3      |          |
|                                       |      |                  |                                                       |     | 20 NHL                              |                           |           |           |           |          |
| Cordonnier <sup>63</sup>              | 2008 | non- comparative | L-AmB 10 mg/kg qwk                                    | 29  | 69 AML<br>17 ALL<br>28 alloSCT      | 3.4                       | 10.3      | N/A       | 13.8      | 3.4      |
| El-Cheikh <sup>119</sup>              | 2007 | non- comparative | L-AmB 7.5 mg/kg qwk                                   | 21  | 100 alloSCT                         | N/A                       | — 4.8 —   | 38.1      | 0         |          |
| Timmers <sup>64</sup>                 | 2000 | rd               | ABCD 2 mg/kg i.v.<br>FLU 200 mg                       | 12  | 25 AML                              | 0                         | N/A       | N/A       | 17        | 0        |
|                                       |      |                  |                                                       | 12  | 8 ALL<br>67 other haematol          | 0                         | N/A       | N/A       | 0         | 0        |

For abbreviations refer to Table S1.

**Table S6. Prophylactic amphotericin B Inhalation.**

| Author                    | Year | Design          | Medication/daily dose per treatment arm               | n=  | Risk factors %                                          | Invasive fungal infection |            |            | Mortality |          |
|---------------------------|------|-----------------|-------------------------------------------------------|-----|---------------------------------------------------------|---------------------------|------------|------------|-----------|----------|
|                           |      |                 |                                                       |     |                                                         | Proven %                  | Probable % | Possible % | Total %   | Fungal % |
| Rijnders                  | 2006 | rd, db, pl      | L-AmB 12.5 mg inh. + FLU (dose N/A)                   | 139 | 49 AML/MDS                                              | 4.3                       | N/A        | N/A        | 2.9*      | 3.6**    |
|                           |      |                 | placebo inh. + FLU (dose N/A)                         | 132 | 21 autoSCT                                              |                           |            |            |           |          |
| Alexander <sup>66</sup>   | 2006 | non-comparative | ABLc 50 mg inh. d1-4, then qwk + FLU p.o./i.v. d1-100 | 40  | 100 alloSCT                                             | 7.5                       | 0          | 0%         | 30        | 2.5      |
| Erjavec <sup>64</sup>     | 1997 | non-comparative | AmB 30 mg inh.                                        | 42  | 52 AML<br>41 ALL<br>7 other haematol                    | 14                        | 14         | N/A        | N/A       | 7.1      |
| Schwartz <sup>65</sup>    | 1999 | rd              | AmB 20 mg inh. no prophylaxis                         | 227 | 74 AML                                                  | 1.8                       | 2.2        | 0.4        | 13        | 8        |
|                           |      |                 |                                                       | 155 | 9 ALL/NHL relapse<br>17 autoSCT                         | 0.6                       | 5.8        | 0.6        | 10        | 7        |
| Hertenstein <sup>63</sup> | 1994 | non-comparative | AmB 20 mg inh.                                        | 303 | 55 AML<br>26 CML<br>19 other<br>89 alloSCT<br>9 autoSCT | 3.6                       | N/A        | N/A        | 20.5      | 2.6      |
| Takatsuka <sup>101</sup>  | 1999 | hist contr      | AmB 300 mg + AmB sol 300 mg + inh. (dose N/A)         | 70  | 46 AML<br>18 ALL                                        | 7                         | N/A        | N/A        | N/A       | N/A      |
|                           |      |                 | FLU 200 mg + AmB sol 300 mg + AmB inh. (dose N/A)     | 54  | 19 NHL<br>5 CML                                         | 0                         | N/A        | N/A        | N/A       | N/A      |

For abbreviations refer to Table S1, \*at 28 days, \*\*at 24 weeks.

**Table S7. Caspofungin and micafungin prophylaxis.**

| Author                  | Year | Design     | Medication/daily dose per treatment arm                   | n=  | Risk factors %                                                 | Invasive fungal infection |            |            | Mortality |          |
|-------------------------|------|------------|-----------------------------------------------------------|-----|----------------------------------------------------------------|---------------------------|------------|------------|-----------|----------|
|                         |      |            |                                                           |     |                                                                | Proven %                  | Probable % | Possible % | Total %   | Fungal % |
| van Burik <sup>89</sup> | 2004 | rd, db, pl | MIC 50 mg<br>FLU 400 mg i.v.                              | 425 | 14 AML                                                         | 20                        | 26.5       | N/A        | 4.2       | 0.2      |
|                         |      |            |                                                           | 457 | 3 ALL<br>12 CML<br>24 NHL<br>20 MM<br>46 autoSCT<br>54 alloSCT |                           |            |            |           |          |
| Hashino <sup>96</sup>   | 2008 | hist contr | MIC 100 mg<br>FLU 400 p.o. OR i.v.                        | 44  | 27 AML                                                         | 0                         | 0          | 11.4       | 9.1       | 0        |
|                         |      |            |                                                           | 29  | 19 ALL<br>54 other<br>100 alloSCT                              | 6.9                       | 3.4        | 24.1       | 10.3      | 6.9      |
| Mattiuzzi <sup>87</sup> | 2006 | rd         | CAS 50 mg<br>ITR 400 mg i.v. (d1-2),<br>200 mg i.v. (d3-) | 107 | 75 AML                                                         | 6.5                       | N/A        | N/A        | 6.5       | 3.7      |
|                         |      |            |                                                           | 90  | 25 MDS                                                         | 5.5                       | N/A        | N/A        | 7.8       | 2.2      |

For abbreviations refer to Table S1.

## Additional references

45. Vehreschild JJ, Bohme A, Buchheidt D, Arenz D, Harnischmacher U, Heussel CP, et al. A double-blind trial on prophylactic voriconazole (VRC) or placebo during induction chemotherapy for acute myelogenous leukaemia (AML). *J Infect* 2007;55:445-9.
116. Doellmann T, Klimasch T, Heil G, Krauter J, Elser C, Ganser A, et al. Effective prophylaxis of chronic disseminated candidiasis and pulmonary infiltrations in acute leukemia patients with intensive low-dose i.v. amphotericin B. *Jahrestagung der Deutschen Gesellschaft für Hämatologie und Onkologie*; 1999. Jena p. 505.
117. Rousey SR, Russler S, Gottlieb M, Ash RC. Low-dose amphotericin B prophylaxis against invasive Aspergillus infections in allogeneic marrow transplantation. *Am J Med* 1991;91:484-92.
118. Riley DK, Pavia AT, Beatty PG, Petersen FB, Spruance JL, Stokes R, et al. The prophylactic use of low-dose amphotericin B in bone marrow transplant patients. *Am J Med* 1994; 97:509-14.
119. El-Cheikh J, Faucher C, Furst S, Duran S, Berger P, Vey N, et al. High-dose weekly liposomal amphotericin B antifungal prophylaxis following reduced-intensity conditioning allogeneic stem cell transplantation. *Bone Marrow Transplant* 2007;39:301-6.
